# Supplementary material for: Examining the ability to track multiple moving targets as a function of postural stability: a comparison between team sports players and sedentary individuals
Source: PeerJ. 2022 Sep 2;10:e13964. doi: 10.7717/peerj.13964 (PMC9443790; doi:10.7717/peerj.13964)
Supplement: Supplemental Information 1 — Data analyzed to determine the possible differences between groups under three levels of postural stability. [file peerj-10-13964-s001.xlsx]

## Sheet: DATABASE
Code	Group	Sports discipline	MOT _high-stability	MOT _medium-stability	MOT_low-stability	Static_OSI [°]	Static_APSI [°]	Static_MLSI [°]	Dynamic_OSI [°]	Dynamic_APSI [°]	Dynamic_MLSI [°]
1	Athlete	Basketball	33.38	28.518	30.341	0.2	0.2	0.1	1.6	1.5	1.3
2	Athlete	Basketball	26.087	33.987	33.38	0.2	0.1	0.2	0.9	0.3	0.7
3	Athlete	Basketball	37.634	38.242	27.91	0.3	0.1	0.2	1	0.7	0.4
4	Athlete	Basketball	28.518	24.871	26.087	0.1	0.1	0.1	0.9	0.4	0.7
5	Athlete	Basketball	26.087	33.38	26.087	0.2	0.1	0.1	0.4	0.8	1
6	Athlete	Basketball	39.457	30.341	30.341	0.4	0.3	0.2	0.9	0.7	0.4
7	Athlete	Basketball	33.38	23.656	18.794	0.6	0.5	0.2	0.6	0.4	0.3
8	Athlete	Handball	33.38	25.479	35.203	0.2	0.1	0.1	0.6	0.4	0.3
9	Athlete	Handball	28.518	26.694	25.479	0.3	0.2	0.2	0.7	0.4	0.5
10	Athlete	Handball	35.811	23.048	28.518	0.2	0.1	0.1	1.1	0.8	0.5
11	Athlete	Handball	27.91	26.694	25.479	0.2	0.1	0.1	0.8	0.5	0.5
12	Athlete	Handball	26.087	20.617	25.479	0.1	0.1	0.1	0.8	0.6	0.3
13	Athlete	Handball	41.28	41.888	40.673	0.2	0.1	0.1	0.9	0.7	0.4
14	Athlete	Soccer	36.418	33.38	32.772	0.3	0.2	0.1	0.8	0.4	0.6
15	Athlete	Soccer	41.888	28.518	32.164	0.6	0.4	0.4	1	0.8	0.5
16	Athlete	Soccer	30.949	30.949	30.949	0.3	0.2	0.2	0.7	0.4	0.5
17	Athlete	Soccer	32.164	28.518	32.164	1	0.9	0.1	1.2	1	0.6
18	Athlete	Soccer	44.319	29.135	33.38	0.1	0.1	0.1	0.9	0.7	0.4
19	Athlete	Soccer	35.203	30.341	27.91	0.4	0.2	0.2	1	1	0.1
20	Non-athlete	Control	30.949	21.225	22.44	0.2	0.1	0.1	0.7	0.4	0.5
21	Non-athlete	Control	33.38	29.733	15.755	0.3	0.2	0.1	1	0.7	0.6
22	Non-athlete	Control	24.263	26.694	25.479	0.9	0.8	0.3	0.9	0.7	0.4
23	Non-athlete	Control	31.556	28.518	29.125	0.2	0.2	0.1	0.9	0.7	0.4
24	Non-athlete	Control	26.087	24.871	28.518	0.4	0.3	0.2	1	0.5	0.8
25	Non-athlete	Control	21.225	18.794	20.009	0.3	0.2	0.1	1.1	0.6	0.8
26	Non-athlete	Control	27.91	26.087	32.164	0.3	0.2	0.2	1.7	1.3	1.2
27	Non-athlete	Control	23.048	17.578	28.518	0.1	0.1	0	1	0.6	0.7
28	Non-athlete	Control	30.949	21.225	29.733	0.3	0.2	0.1	0.8	0.6	0.3
29	Non-athlete	Control	33.38	26.087	38.242	0.4	0.4	0.1	0.6	0.4	0.3
30	Non-athlete	Control	23.656	21.225	23.048	0.3	0.2	0.1	0.6	0.4	0.2
31	Non-athlete	Control	26.087	25.479	19.401	0.2	0.2	0.1	0.9	0.6	0.7
32	Non-athlete	Control	32.164	25.479	32.772	0.3	0.2	0.1	0.8	0.8	0.4
33	Non-athlete	Control	29.733	29.125	22.44	1.1	0.7	0.8	1.8	1.6	0.7
34	Non-athlete	Control	39.457	32.164	25.479	0.3	0.2	0.1	0.9	0.4	0.8
35	Non-athlete	Control	20.617	24.263	25.479	0.3	0.2	0.1	0.6	0.4	0.3
